# Supplementary material for: The co-design, development, and preliminary evaluation of a comprehensive breast cancer risk report incorporating polygenic risk information
Source: Research Square preprint supplement (doi:10.21203/rs.3.rs-8282906/v1), 2026-02-13
Supplement: Supplementary file 1 [file 100387fa55a33fd47645c861.xlsx]

## Sheet: Sheet1
Table 3. Heatmap of participants level of agreement toward the visuals tools, content and layout of the report. Participant agreement was scored as +1, disagreement as -1, and a neutral perspective as 0. Darker green to lighter green colour represents a higher overall score indicating agreement with the statement, darker red to lighter red colour represents a lower overall score or disagreement w…
Report Visual Tools	Genetiic Counsellor Participant Agreement
Visual tools are helpful or have meaning	8
- Icon array visual	5
- Cumulative risk visual	8
Visul tools may be frightening or overwhelming for patients	-2
- Icon array visual	-2
- Cumulative risk visual	-7
Visuals are unclear or confusing for patients	-6
- Icon array visual	-8
- Cumulative risk visual	-6
Visual tools would be used for risk management discussions	4
Report Content	Genetic Counsellor Participant Agreement
PAGE 1
Language is acceptable*	14
Content sections are acceptable	9
PAGE 2
Language is acceptable*	8
Sections	Content sections are acceptable		Content sections need to change^
- Risk categories	4		-4
- Single gene variant	1		-1
- Polygenic risk score	2		-2
- Personal and lifestyle factors	7		5
- Family history	3		4
- Limitations	11		0
PAGE 3
Sections	Content sections are acceptable		Content sections need to change^
- Cancer risk management and recommendations	5		0
- Surgical	-1		0
- Screening	0		0
- Risk reducing medication	1		-1
- Lifestyle changes to reduce risk	1		-1
- Does this result affect my family members?	6		0
- Additional resources	5		2
*acceptable defined by participants as clear, patient-friendly and/or personalised, with content not being repetitive or needing removal.
^changes include reduction in content density, wording and/or further personalisation needed.
Report Layout	Genetic Counsellor Participant Agreement
COLOUR
The overall colour scheme is acceptable	0
Blue colour for risk is preferred to red colour	3
Use of red colour would be alarming to patients	5
TEXT
Text size is acceptable	2
Text needs to change†	0
REPORT LENGTH
Current length is acceptable	-4
- Add pages	-1
- Cut to two pages	-3
STRUCTURE AND FORMAT
Overall structure and format is acceptable	5
- Liked Page 1 structure and format	2
- Liked Page 2 structure and format	3
- Liked Page 3 structure and format	4
Overall structure and format needs to change	-4
- The report is too busy/too dense	4
† changes include reducing text size and/or bolding or underlining risk text.
