# Supplementary material for: The co-design, development, and preliminary evaluation of a comprehensive breast cancer risk report incorporating polygenic risk information
Source: Research Square preprint supplement (doi:10.21203/rs.3.rs-8282906/v1), 2026-02-13
Supplement: Supplementary file 2 [file 504a2281e93e74403d63a4f9.xlsx]

## Sheet: Sheet1
Table 1. Phase one consumer survey demographics
	Group allocations
Visual risk figures	Icon array (A)	Lifetime cumulative risk (B)	Skewed distribution curve (C)	Sliding scale (D)
Number of participants n (%)	36 (28.6)	45 (35.7)	43 (34.4)	40 (31.7)
Age (years)
Range	22 - 68	23 - 75	20 -72	24 - 66
Mean ± SD	42.8 ± 13.6	45.7 ± 16.6	38.4 ± 13.7	44.6 ± 12.0
Relationship status (partnered) n (%)	21 (63.6)	25 (59.5)	30 (69.8)	26 (66.7)
Tertiary education (yes) n (%)	20 (60.6)	25 (59.5)	22 (51.2)	28 (71.8)
Aboroginal or Torres Strait Islander (yes) n (%)	0 (0)	0 (0)	0 (0)	0 (0)
