# Supplementary material for: The co-design, development, and preliminary evaluation of a comprehensive breast cancer risk report incorporating polygenic risk information
Source: Research Square preprint supplement (doi:10.21203/rs.3.rs-8282906/v1), 2026-02-13
Supplement: Supplementary file 3 [file 7fb2586939a043e99860755b.xlsx]

## Sheet: Sheet1
Table 4. Key recommendations for report changes made by four or more Genetic Counsellors
Make the risks to family members clearer in the “familial implications” section
Provide more actionable information on accessing risk management
Consider changing the order of content on page 1 and page 2
Personalise the “lifestyle factors” and “family history” sections
Add age-related risk information, such as current, 5- and 10-year, and residual risk
Sign post to resources regarding positive lifestyle modifications
Improve language and reduce words in the “single gene” section
Use more personalised language throughout
Include a greater emphasis that risk changes with time
Provide the contact details of the patient’s Familial Cancer Centre
