# Supplementary material for: The co-design, development, and preliminary evaluation of a comprehensive breast cancer risk report incorporating polygenic risk information
Source: Research Square preprint supplement (doi:10.21203/rs.3.rs-8282906/v1), 2026-02-13
Supplement: Supplementary file 4 [file a7fa1aed1320332113f7d9ac.xlsx]

## Sheet: Sheet1
Table 2. Interview participant demographics
Phase 1. Consumer participant interview demographics
Number of participants	n = 11
Average interview duration mins (range)	27 (16 – 34)
Average years of age (range)	42.5 (26 – 67)
Time since testing
>3 years	n = 4
<3 years	n = 7
Genes tested
BRCA1	n = 5
BRCA2	n = 5
PALB2	n = 1
Genetic test result
Positive	n = 7
Negative	n = 4
Phase 1. Medical practitioner participant interview demographics
Number of participants	n = 11
Average interview duration mins (range)	38 (30 – 45)
Average years working in profession (range)	11 (3 – 40)
Work in an FCC
Yes	n = 5
No	n = 6
Primary specialty
Medical oncology	n = 8
Genetics	n = 2
Gastroenterology	n = 1
Phase 2. Genetic counsellor participant interview demographics
Number of participants	n = 10
Average interview duration min (range)	48 (40 – 66)
Average years working in profession (range)	7.6 (2 – 20)
Genetic counselling certification status
Associate GC	n = 5
Certified GC	n = 5
Prototype report shown
High risk	n = 4
Moderate risk	n = 4
Population risk	n = 2
